# Supplementary material
Source: MDPI journal article supplement (https://www.mdpi.com/2073-4344/11/3/305)
Supplement: s1 [file s1]

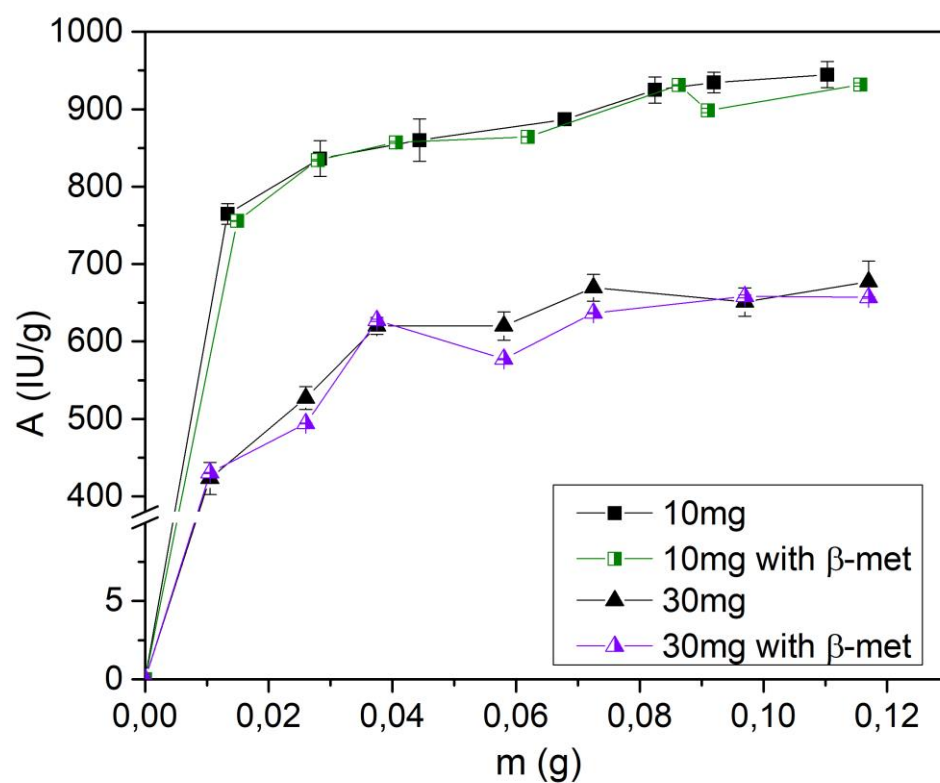

Figure S1: Effect of mass of the alcalase-alginate biocatalyst (immobilized alcalase) obtained by using one step and two-step conjugation protocol (with addition of 2-mercaptoethanol) on activity of the immobilized enzyme at two initial EDAC/microbeads mass ratio.
